# Supplementary material
Source: Springer Nature journal article supplement (https://www.springermedizin.de/resource/supplementary/12885_2011_2746_MOESM5_ESM.pdf/9461870)

**A****U266**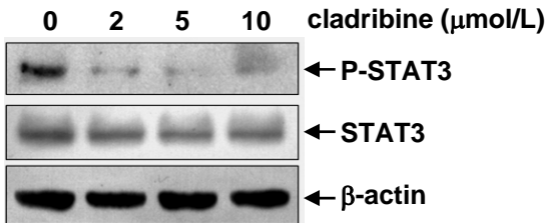**B****RPMI8226**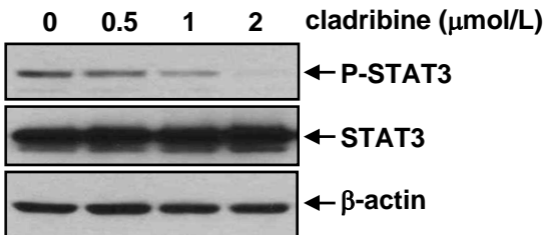**C****MM1.S**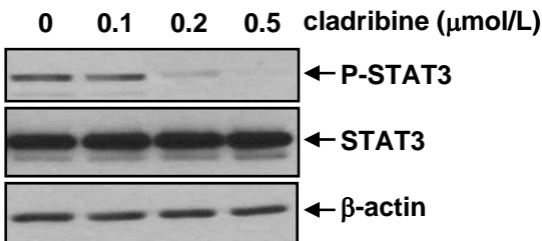

Supplement: MOESM5 [file 9461870]
